# Supplementary material
Source: HighWire-hosted journal article supplement (https://care.diabetesjournals.org/content/suppl/2007/06/11/dc06-2042)
Supplement: DC062042OnlineAppendixEnglish.pdf [file DC062042OnlineAppendixEnglish.pdf]

## Barriers to Insulin Treatment Questionnaire (BIT)

On the following pages are expectations and concerns that people with diabetes might have about their condition and treatment. By marking your response on a scale from 1 to 10, please let us know how much you agree or disagree with each of the following statements.

1 I am afraid of the pain when injecting insulin.

**totally disagree**

**totally agree**

1 2 3 4 5 6 7 8 9 10

2 Besides the pain, I am just afraid of injections.

**totally disagree**

**totally agree**

1 2 3 4 5 6 7 8 9 10

3 I am afraid of the pain during regular blood-sugar checks.

**totally disagree**

**totally agree**

1 2 3 4 5 6 7 8 9 10

4 Insulin works better than pills.

**totally disagree**

**totally agree**

1 2 3 4 5 6 7 8 9 10

5 People who get insulin feel better.

**totally disagree**

**totally agree**

1 2 3 4 5 6 7 8 9 10

6 Insulin can reliably prevent long-term complications due to diabetes.

**totally disagree**

**totally agree**

1 2 3 4 5 6 7 8 9 10

7 I just don't have enough time for regular doses of insulin.

**totally disagree**

**totally agree**

1 2 3 4 5 6 7 8 9 10

| Barriers to Insulin Treatment Questionnaire (BIT) |                                                                                                                                                  |                          |                          |                          |                          |                          |                          |                          |                          |
|---------------------------------------------------|--------------------------------------------------------------------------------------------------------------------------------------------------|--------------------------|--------------------------|--------------------------|--------------------------|--------------------------|--------------------------|--------------------------|--------------------------|
| 8                                                 | I can't pay as close attention to my diet as insulin treatment requires.                                                                         |                          |                          |                          |                          |                          |                          |                          |                          |
| <b>totally disagree</b>                           |                                                                                                                                                  |                          |                          |                          |                          |                          | <b>totally agree</b>     |                          |                          |
| 1                                                 | 2                                                                                                                                                | 3                        | 4                        | 5                        | 6                        | 7                        | 8                        | 9                        | 10                       |
| <input type="checkbox"/>                          | <input type="checkbox"/>                                                                                                                         | <input type="checkbox"/> | <input type="checkbox"/> | <input type="checkbox"/> | <input type="checkbox"/> | <input type="checkbox"/> | <input type="checkbox"/> | <input type="checkbox"/> | <input type="checkbox"/> |
| 9                                                 | I can't organize my day as carefully as insulin treatment requires.                                                                              |                          |                          |                          |                          |                          |                          |                          |                          |
| <b>totally disagree</b>                           |                                                                                                                                                  |                          |                          |                          |                          |                          | <b>totally agree</b>     |                          |                          |
| 1                                                 | 2                                                                                                                                                | 3                        | 4                        | 5                        | 6                        | 7                        | 8                        | 9                        | 10                       |
| <input type="checkbox"/>                          | <input type="checkbox"/>                                                                                                                         | <input type="checkbox"/> | <input type="checkbox"/> | <input type="checkbox"/> | <input type="checkbox"/> | <input type="checkbox"/> | <input type="checkbox"/> | <input type="checkbox"/> | <input type="checkbox"/> |
| 10                                                | Injections in public are embarrassing to me. Pills are more discreet.                                                                            |                          |                          |                          |                          |                          |                          |                          |                          |
| <b>totally disagree</b>                           |                                                                                                                                                  |                          |                          |                          |                          |                          | <b>totally agree</b>     |                          |                          |
| 1                                                 | 2                                                                                                                                                | 3                        | 4                        | 5                        | 6                        | 7                        | 8                        | 9                        | 10                       |
| <input type="checkbox"/>                          | <input type="checkbox"/>                                                                                                                         | <input type="checkbox"/> | <input type="checkbox"/> | <input type="checkbox"/> | <input type="checkbox"/> | <input type="checkbox"/> | <input type="checkbox"/> | <input type="checkbox"/> | <input type="checkbox"/> |
| 11                                                | Regular insulin treatment causes feelings of dependence.                                                                                         |                          |                          |                          |                          |                          |                          |                          |                          |
| <b>totally disagree</b>                           |                                                                                                                                                  |                          |                          |                          |                          |                          | <b>totally agree</b>     |                          |                          |
| 1                                                 | 2                                                                                                                                                | 3                        | 4                        | 5                        | 6                        | 7                        | 8                        | 9                        | 10                       |
| <input type="checkbox"/>                          | <input type="checkbox"/>                                                                                                                         | <input type="checkbox"/> | <input type="checkbox"/> | <input type="checkbox"/> | <input type="checkbox"/> | <input type="checkbox"/> | <input type="checkbox"/> | <input type="checkbox"/> | <input type="checkbox"/> |
| 12                                                | When people inject insulin, it makes them feel like drug addicts.                                                                                |                          |                          |                          |                          |                          |                          |                          |                          |
| <b>totally disagree</b>                           |                                                                                                                                                  |                          |                          |                          |                          |                          | <b>totally agree</b>     |                          |                          |
| 1                                                 | 2                                                                                                                                                | 3                        | 4                        | 5                        | 6                        | 7                        | 8                        | 9                        | 10                       |
| <input type="checkbox"/>                          | <input type="checkbox"/>                                                                                                                         | <input type="checkbox"/> | <input type="checkbox"/> | <input type="checkbox"/> | <input type="checkbox"/> | <input type="checkbox"/> | <input type="checkbox"/> | <input type="checkbox"/> | <input type="checkbox"/> |
| 13                                                | An insulin overdose can lead to extremely low blood-sugar levels ("hypoglycemia"). I am afraid of the unpleasant accompanying symptoms.          |                          |                          |                          |                          |                          |                          |                          |                          |
| <b>totally disagree</b>                           |                                                                                                                                                  |                          |                          |                          |                          |                          | <b>totally agree</b>     |                          |                          |
| 1                                                 | 2                                                                                                                                                | 3                        | 4                        | 5                        | 6                        | 7                        | 8                        | 9                        | 10                       |
| <input type="checkbox"/>                          | <input type="checkbox"/>                                                                                                                         | <input type="checkbox"/> | <input type="checkbox"/> | <input type="checkbox"/> | <input type="checkbox"/> | <input type="checkbox"/> | <input type="checkbox"/> | <input type="checkbox"/> | <input type="checkbox"/> |
| 14                                                | An insulin overdose can lead to extremely low blood-sugar levels ("hypoglycemia"). I have concerns about possible permanent damage to my health. |                          |                          |                          |                          |                          |                          |                          |                          |
| <b>totally disagree</b>                           |                                                                                                                                                  |                          |                          |                          |                          |                          | <b>totally agree</b>     |                          |                          |
| 1                                                 | 2                                                                                                                                                | 3                        | 4                        | 5                        | 6                        | 7                        | 8                        | 9                        | 10                       |
| <input type="checkbox"/>                          | <input type="checkbox"/>                                                                                                                         | <input type="checkbox"/> | <input type="checkbox"/> | <input type="checkbox"/> | <input type="checkbox"/> | <input type="checkbox"/> | <input type="checkbox"/> | <input type="checkbox"/> | <input type="checkbox"/> |
